# Supplementary material for: Identification, Quantification, and Characterization of HIV-1 Reservoirs in the Human Brain
Source: MDPI journal article supplement (doi:10.3390/cells11152379), 2022-08-02
Supplement: s1 [file s1]

## Supplementary Materials:

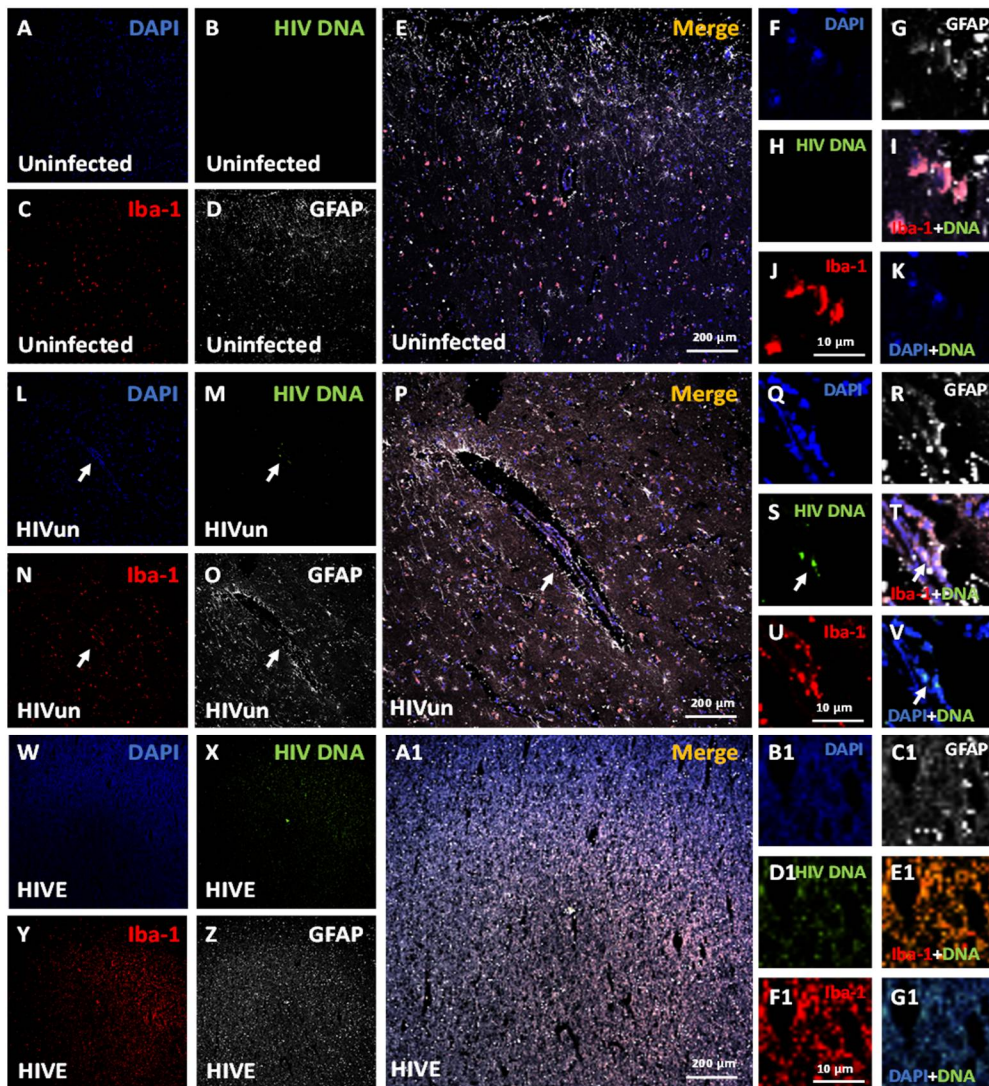

**Supplemental Figure S1. Large tissue areas denote the rare distribution of viral reservoirs within the human brain of HIV-infected individuals with undetectable replication.** (A-E) Representative large confocal images show the expression and distribution of nuclei (DAPI), HIV nef DNA (HIV DNA), macrophage/microglia marker (Iba-1), astrocytes (GFAP), and merge of all colors in uninfected brain tissues (frontal cortex and hippocampus). (F-K) enlarged areas denote DAPI, GFAP, HIV DNA, Iba-1+DNA, Iba-1, and DAPI+DNA at large magnification in uninfected tissues. (L-P) Correspond to the same staining described above using HIV-infected tissues from individuals with undetected systemic replication (HIV<sub>un</sub>). We must denote those large areas of the brain tissues analyzed were negative for HIV DNA. (Q-V) represent enlarged areas to denote DAPI, GFAP, HIV DNA, Iba-1+DNA, Iba-1, and DAPI+DNA at high magnification using HIV-infected tissues from individuals with undetected, low and high systemic viral replication. See the location of HIV DNA in the nucleus in viral reservoirs. (W-A1) Correspond to brain tissues obtained from HIV encephalitic tissues (HIVE) from early ART stages. Denote the high expression of Iba-1 and GFAP positive cells as well as the abundance of HIV DNA. (B1-G1) Corresponds to the high magnification of the areas described in the large magnification.

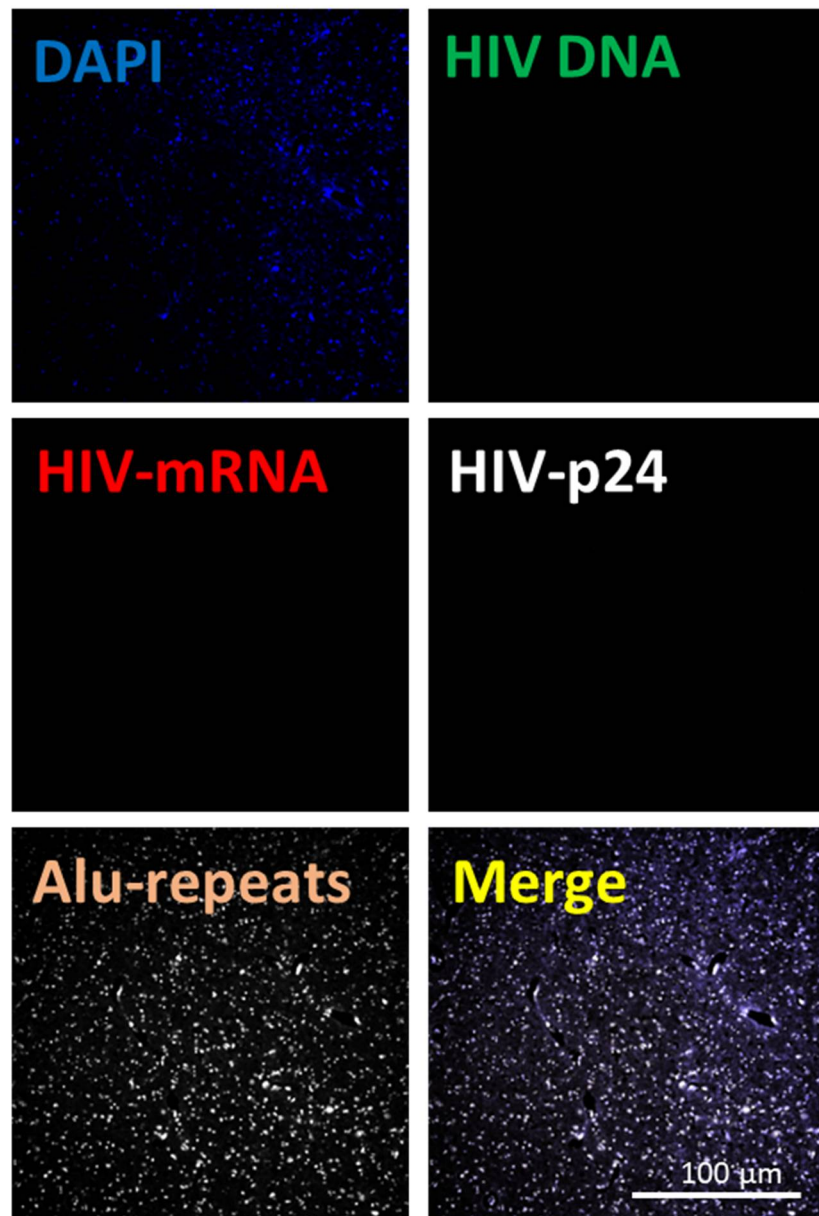

**Supplemental Figure S2. Staining of human brain tissues obtained from uninfected individuals to determine the specificity of HIV DNA, mRNA, and viral HIV-p24 staining.** Representative images of brain tissue sections from uninfected individuals stained for DAPI, HIV DNA, HIV-mRNA, HIV-p24 and Alu-repeats, and the merge of all colors. As expected, we only observed staining for DAPI and Alu-repeats in the uninfected brain tissues. There was no unspecific staining for HIV DNA, HIV-gag-pol mRNA, or HIV-p24 protein in uninfected tissues. Bar= 100  $\mu$ m.

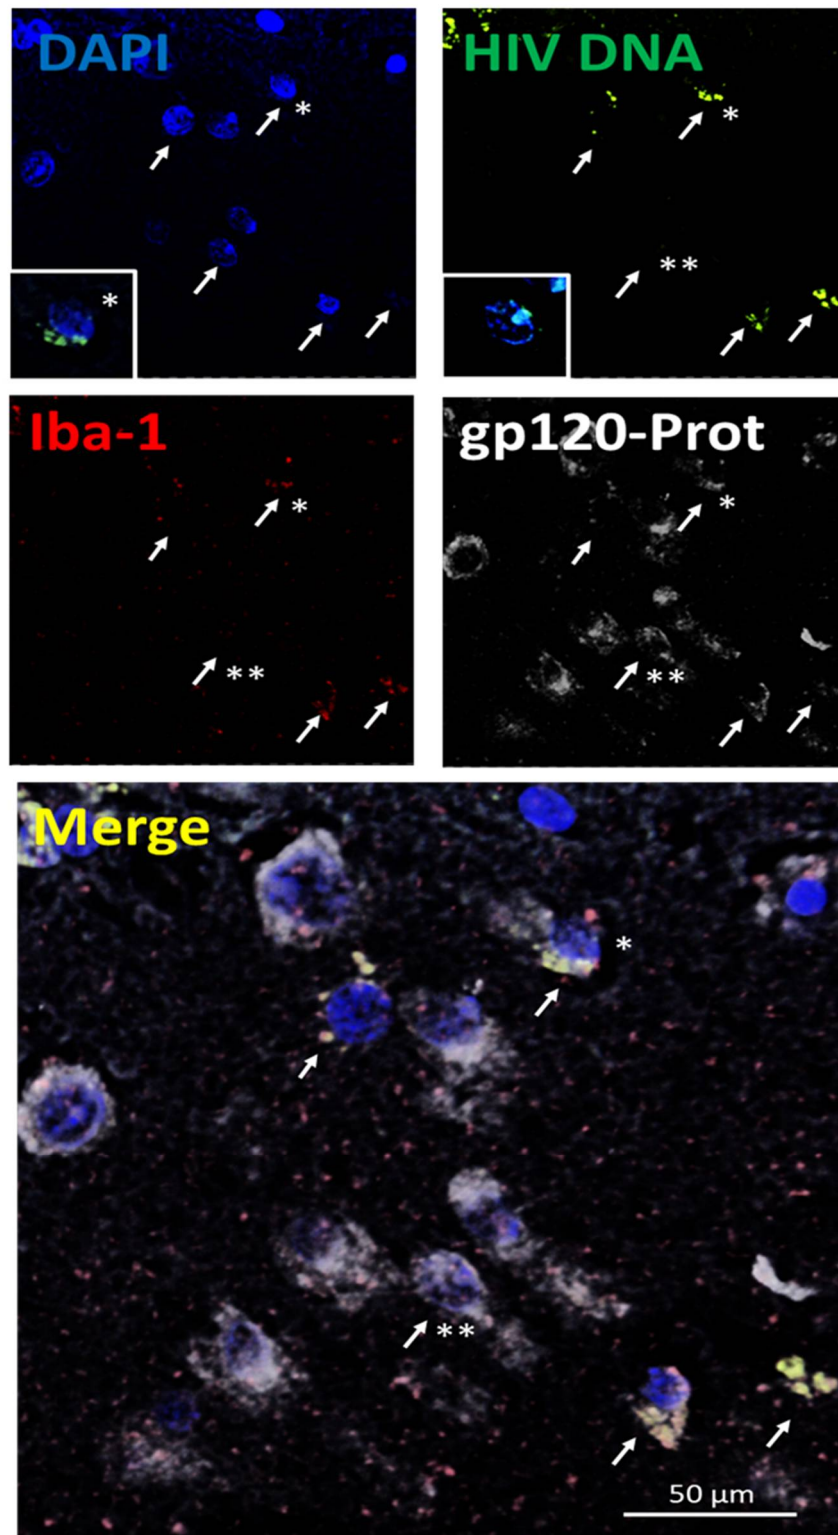

**Supplemental Figure S3. High magnification of human brain tissue sections stained for HIV-gp120.** Representative confocal images of brain tissue sections were obtained from individuals with undetectable or low systemic replication and stained for DAPI, HIV DNA, Iba-1, and HIV-gp120 protein. Arrows denote cells with HIV DNA signal in the nucleus, and asterisks represent cells with high gp120 accumulation and positive for HIV DNA within the nucleus. Bar= 50  $\mu$ m.



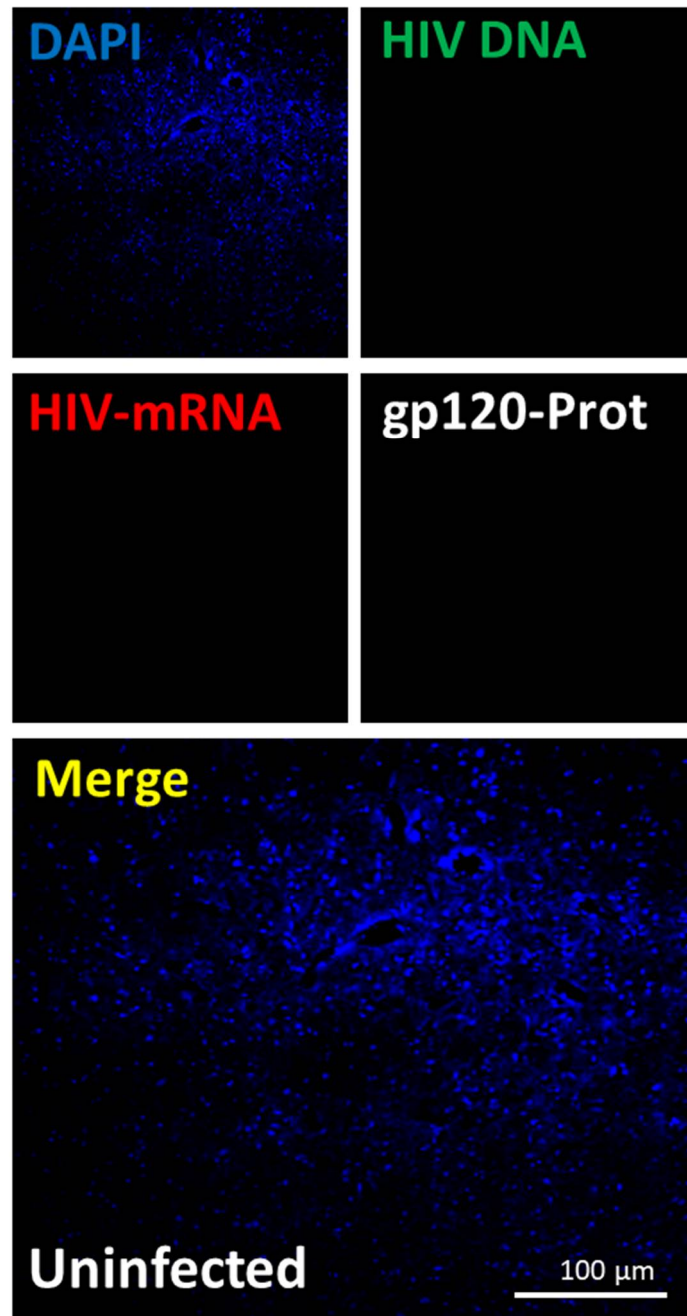

**Supplemental Figure S4. Staining of human brain tissues from uninfected individuals to determine the specificity of HIV DNA, mRNA, and viral HIV-gp120 staining.** Representative images of brain tissue sections from uninfected individuals stained for DAPI, HIV DNA, HIV-mRNA, and HIV-gp120, and the merge of all colors. In the uninfected brain tissues, we only observed staining for DAPI as expected. No unspecific staining for HIV DNA, HIV-gag-pol mRNA, or HIV-gp120 protein was detected in uninfected tissues. Bar= 100  $\mu$ m.

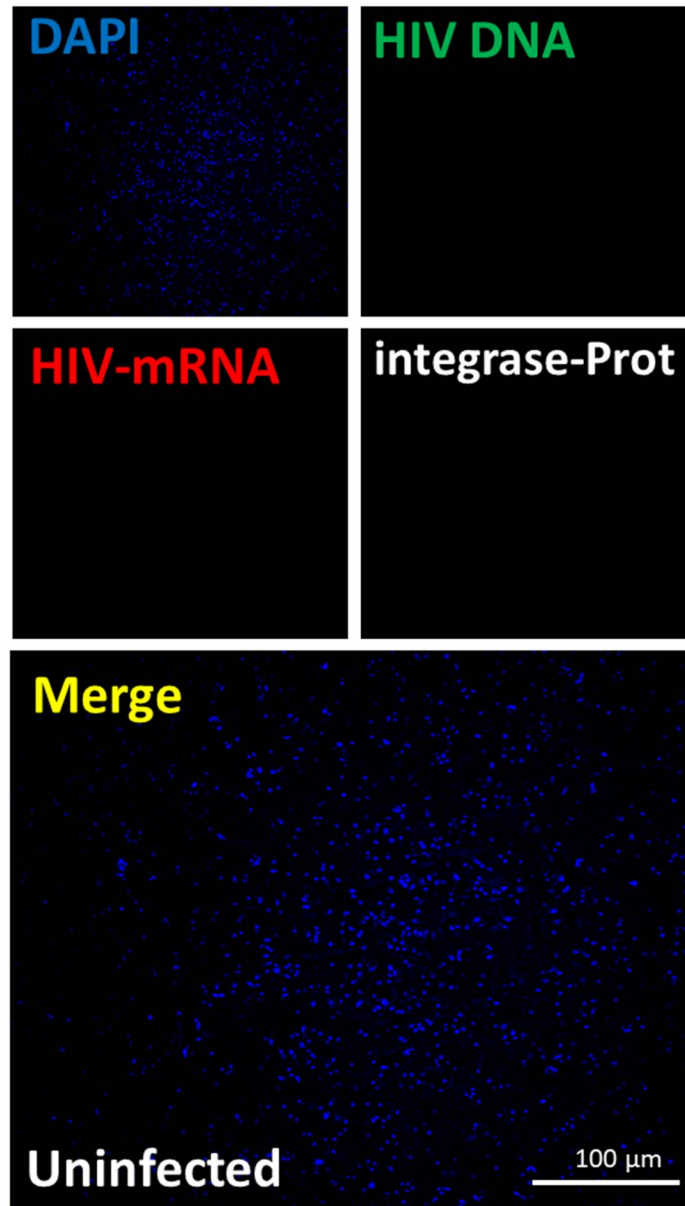

**Supplemental Figure S5. Staining of human brain tissues from uninfected individuals to determine the specificity of HIV DNA, mRNA, and HIV-integrase staining.** Representative images of brain tissue sections from uninfected individuals stained for DAPI, HIV DNA, HIV-mRNA, and HIV-integrase, and the merge of all colors. In the uninfected brain tissues, we only observed staining for DAPI as expected. There was no unspecific staining for HIV DNA, HIV-gag-pol mRNA, or HIV-integrase protein in uninfected tissues. Bar= 100  $\mu$ m.

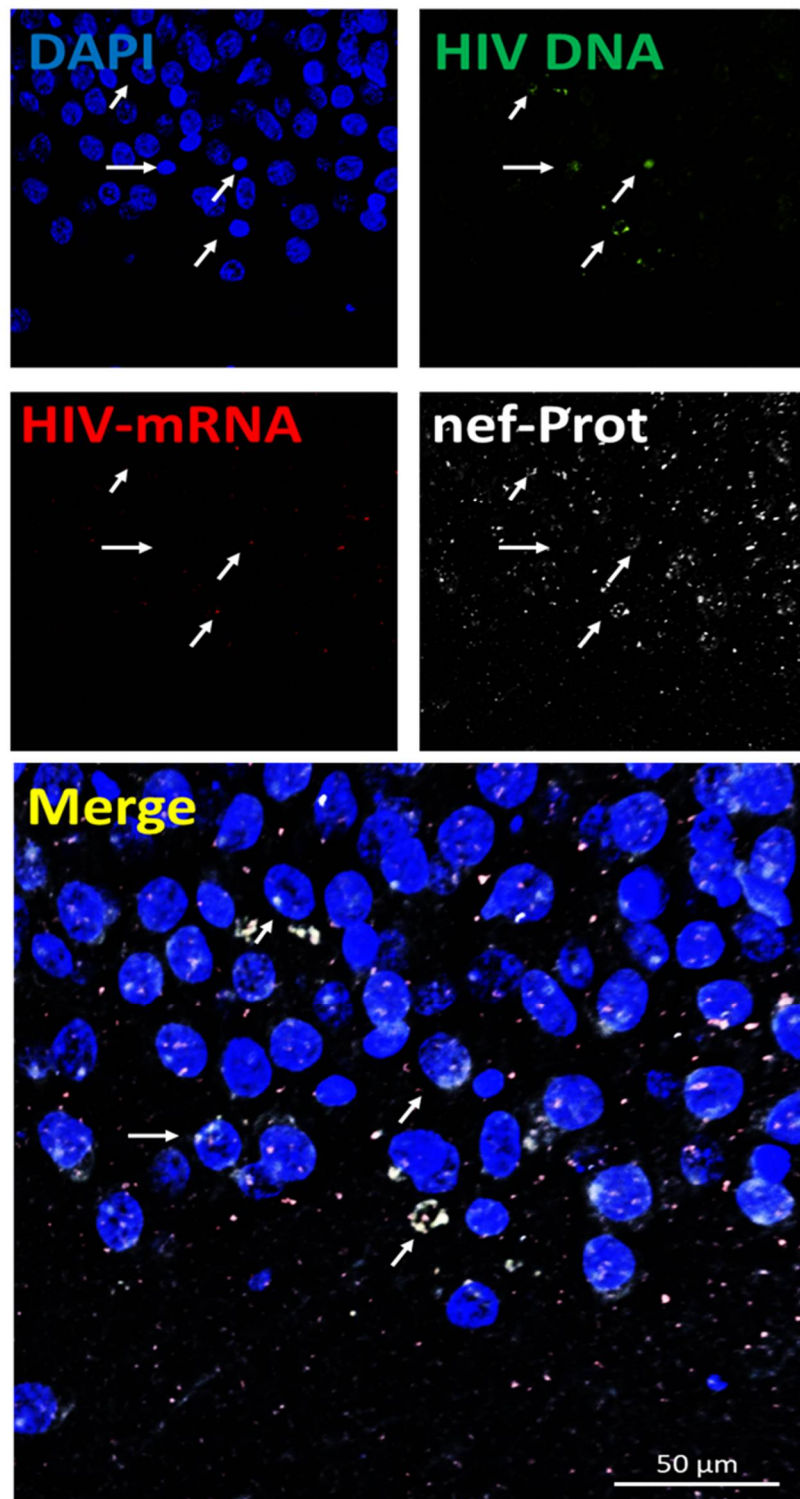

**Supplemental Figure S6. High magnification of human brain tissue sections stained for HIV-nef protein.** Representative confocal images of brain tissue sections were obtained from individuals with undetectable or low systemic replication and stained for DAPI, HIV DNA, Iba-1, and HIV-nef protein. Arrows denote cells with HIV DNA signals in the nucleus. Bar= 50 μm.

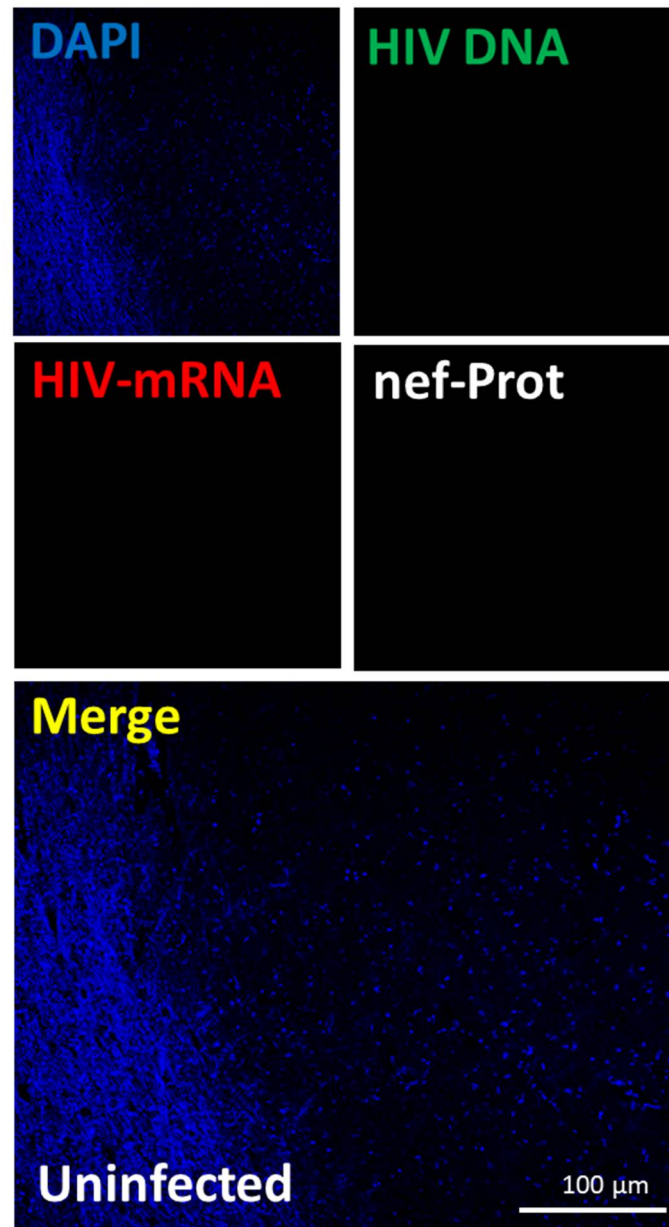

**Supplemental Figure S7. Staining of human brain tissues from uninfected individuals to determine the specificity of HIV DNA, mRNA, and viral HIV-nef staining.** Representative images of brain tissue sections from uninfected individuals stained for DAPI, HIV DNA, HIV-mRNA, and HIV-nef protein, and the merge of all colors. In the uninfected brain tissues, we only observed staining for DAPI as expected. No unspecific staining for HIV DNA, HIV-gag-pol mRNA, or HIV-nef protein was detected in uninfected tissues. Bar= 100  $\mu$ m.

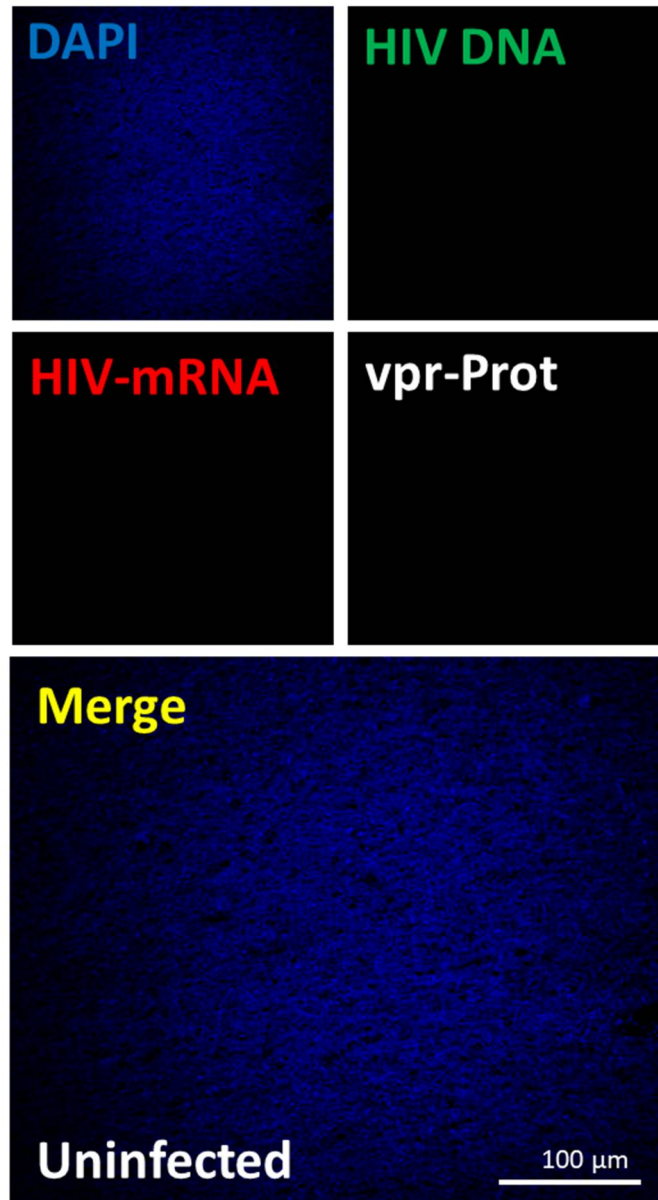

**Supplemental Figure S8. Staining of human brain tissues from uninfected individuals to determine the specificity of HIV DNA, mRNA, and viral HIV-vpr staining.** Representative images of brain tissue sections from uninfected individuals stained for DAPI, HIV DNA, HIV-mRNA, and HIV-vpr and the merge of all colors. In the uninfected brain tissues, we only observed staining for DAPI as expected. There was no unspecific staining for HIV DNA, HIV-gag-pol mRNA, or HIV-vpr protein in uninfected tissues. Bar= 100  $\mu$ m.



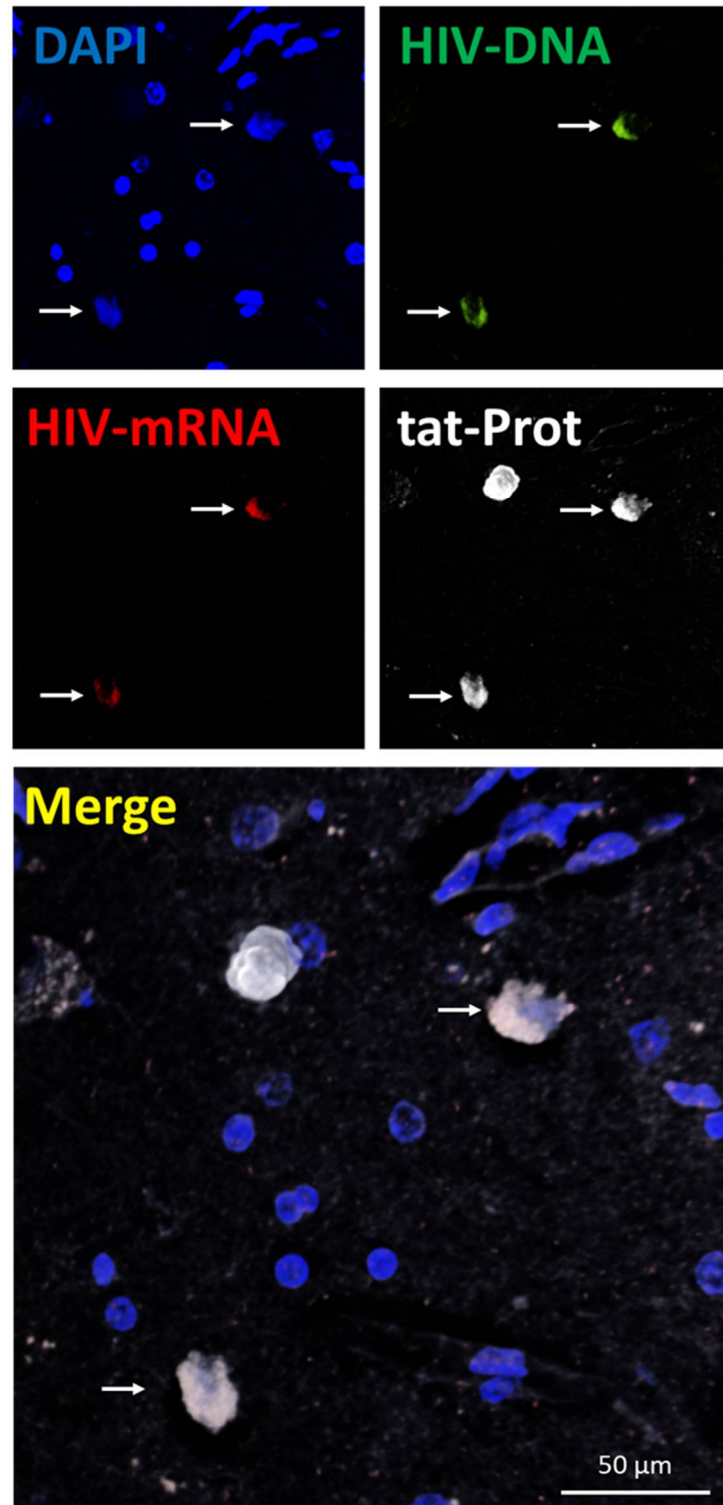

**Supplemental Figure S9. High magnification of human brain tissue sections stained for HIV-tat.** Representative confocal images of brain tissue sections were obtained from individuals with undetectable or low systemic replication and stained for DAPI, HIV DNA, Iba-1, and HIV-tat protein. Arrows denote cells with HIV DNA signal in the nucleus with high HIV-tat accumulation in the cytoplasm and nucleus. We also identified cells with high HIV-tat content but not HIV DNA signal in the nucleus. Bar= 50  $\mu$ m.

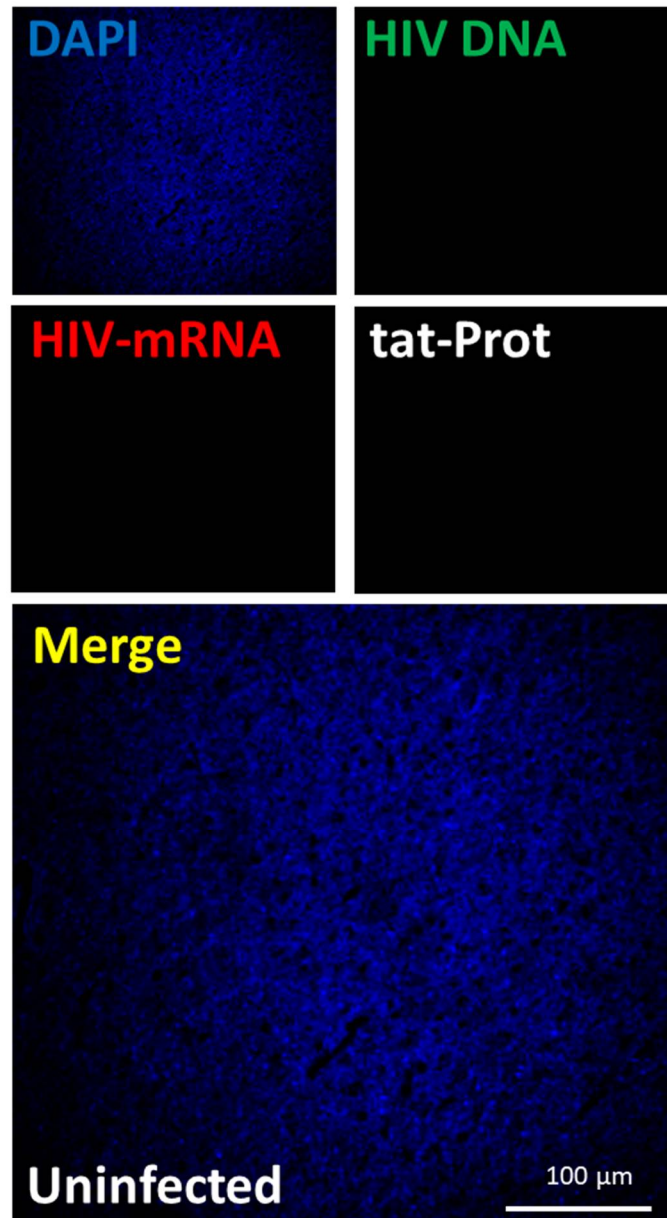

**Supplemental Figure S10. Staining of human brain tissues obtained from uninfected individuals to determine the specificity of HIV DNA, mRNA, and viral HIV-tat staining.** Representative images of brain tissue sections from uninfected individuals stained for DAPI, HIV DNA, HIV-mRNA, and HIV-tat and the merge of all colors. In the uninfected brain tissues, we only observed staining for DAPI as expected. There was no unspecific staining for HIV DNA, HIV-gag-pol mRNA, or HIV-tat protein in uninfected tissues. Bar= 100  $\mu$ m.

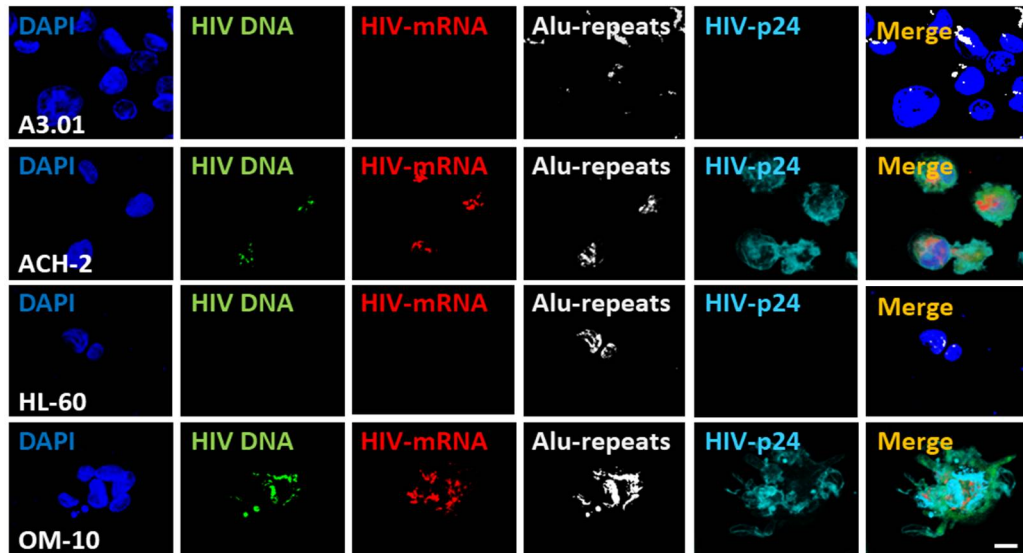

**Supplemental Figure S11: Colocalization examples of DAPI, HIV DNA, HIV-mRNA, Alu-repeats, and HIV-p24 in A3.01, ACH-2, HL-60, and OM-10 cells.** Representative images show uninfected cells (HL-60 and A3.01) and HIV-infected cells (ACH-2 and OM-10) for distribution, colocalization, and sensitivity evaluation. ACH-2 and OM-10 contain only one copy of HIV-integrated DNA. HIV-nef DNA probe, HIV-gag-pol mRNA probe, and HIV-p24 protein were detected in infected cells and not in uninfected cells. DAPI and Alu-repeats DNA probes are shown as controls. Bar= 20  $\mu$ m.

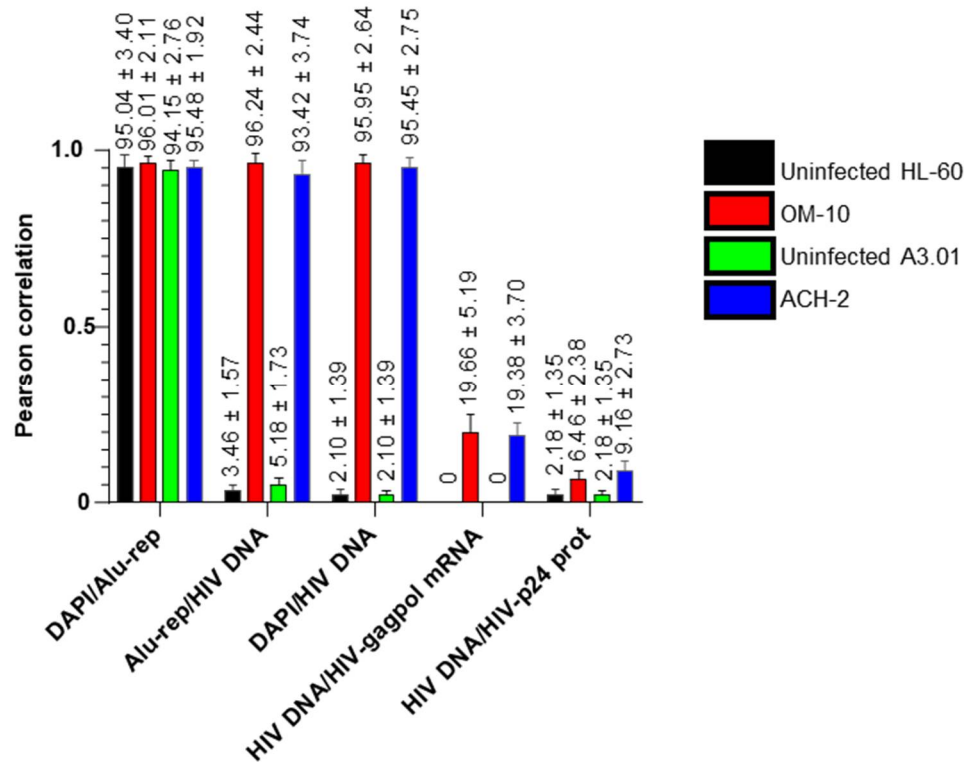

**Supplemental Figure S12. Pearson's colocalization coefficient among the different HIV and host markers was examined.** Analysis of the confocal images to determine the degree of colocalization of the host (Alu and DAPI) and viral (HIV DNA, viral mRNA, and proteins) markers using uninfected cells (HL-60 and A3.01) and HIV-infected cells (ACH-2 and OM-10). The analysis was performed to compare the colocalization of positive pixels for each marker using NIS Elements. Percentages obtained for each type of cell are described.
